# Supplementary material for: Highly effective catalysis of the double-icosahedral Ru19 cluster for dinitrogen dissociation – a first-principles investigation
Source: Royal Society of Chemistry journal article supplement (doi:10.1039/c3cp55144j), 2014-01-01
Supplement: c3cp55144j1.pdf [file c3cp55144j1.pdf]

**Supplementary Information: Highly Effective Catalysis of the  
Double-icosahedral Ru<sub>19</sub> Cluster for Dinitrogen Dissociation –A  
First-Principle Investigation**

Chen-Hao Yeh, Yu-Chieh Lin and Jia-Jen Ho\*

Department of Chemistry, National Taiwan Normal University

No. 88, Section 4, Tingchow Road, Taipei 116, Taiwan

**TABLE S1.** Calculated adsorption energy, bond length, vibrational wavenumbers and total charge population ( $\Delta q / |e|$ ) of  $N_2$  on a  $Ru_{19}$  cluster.

| Site                              | $E_{\text{ads}} / \text{eV}$ | $d(\text{N-N}) / \text{\AA}$ | $d(\text{Ru-N}) / \text{\AA}$ | $\Delta q /  e $ | $\nu(\text{N-N}) / \text{cm}^{-1}$ |
|-----------------------------------|------------------------------|------------------------------|-------------------------------|------------------|------------------------------------|
| $T_{1(\text{side-on})}$           | -0.81                        | 1.17                         | 2.12                          | -0.51            | 1860                               |
| $T_{2(\text{side-on})}$           | -0.44                        | 1.17                         | 2.13                          | -0.45            | 1865                               |
| $T_{3(\text{side-on})}$           | -0.41                        | 1.17                         | 2.12                          | -0.47            | 1902                               |
| $B_{1(\text{end-on})}$            | -0.82                        | 1.15                         | 2.02                          | -0.47            | 2000                               |
| $B_{2(\text{end-on})}$            | -0.61                        | 1.15                         | 2.13                          | -0.46            | 1951                               |
| $B_{3(\text{end-on})}^{\text{a}}$ | -                            | -                            | -                             | -                | -                                  |
| $H_{1(\text{end-on})}^{\text{a}}$ | -                            | -                            | -                             | -                | -                                  |
| $H_{2(\text{end-on})}^{\text{a}}$ | -                            | -                            | -                             | -                | -                                  |
| $H_{3(\text{end-on})}^{\text{a}}$ | -                            | -                            | -                             | -                | -                                  |

<sup>a</sup> Adsorption of  $N_2$  at  $B_3$  site by end-on configuration is unstable and eventually shifts to  $T_2$  site.

Similarly, adsorption of  $N_2$  at  $H_1$ ,  $H_2$  and  $H_3$  sites by end-on configuration would also shift to the  $T_1$ ,  $T_2$  and  $T_3$  sites, respectively.

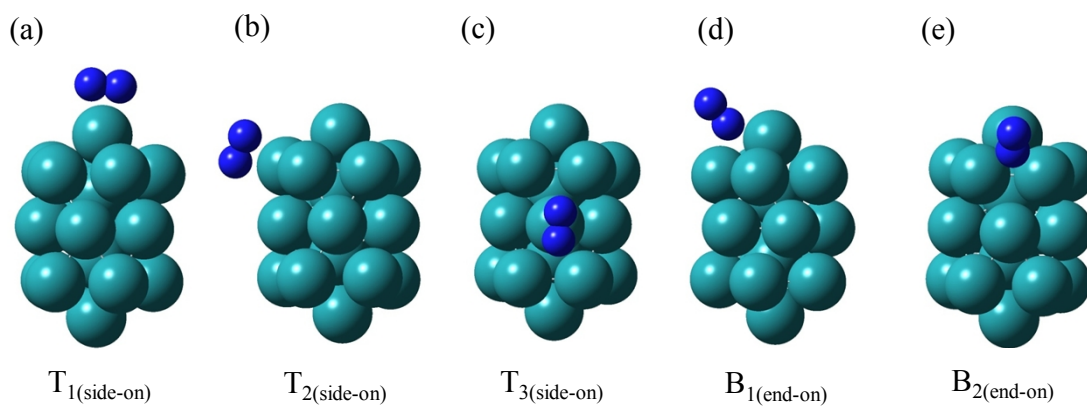

**Figure S1.** Adsorption geometries of  $N_2$  adsorbed on a  $DI-Ru_{19}$  cluster : (a)  $T_{1(\text{side-on})}$ ,

(b)  $T_{2(\text{side-on})}$ , (c)  $T_{3(\text{side-on})}$ , (d)  $B_{1(\text{end-on})}$  and (e)  $B_{2(\text{end-on})}$ .
